# Supplementary material for: Mobile Behavioral Sensing for Outpatients and Inpatients With Schizophrenia
Source: Atypon-hosted journal article supplement (doi:10.1176/appi.ps.201500130), 2015-12-15
Supplement: appi.ps.201500130.ds001.pdf [file appi.ps.201500130.ds001.pdf]

| <b>Appendix<br/>Participant Characteristics</b> | <b>Inpatients (n=11)</b> |          | <b>Outpatients (n=9)</b> |          |
|-------------------------------------------------|--------------------------|----------|--------------------------|----------|
|                                                 | <b>N</b>                 | <b>%</b> | <b>N</b>                 | <b>%</b> |
| <b>Age (M ± SD)</b>                             | 37.6±11.9                |          | 39.4±11.7                |          |
| <b>Gender</b>                                   |                          |          |                          |          |
| Male                                            | 10                       | 91       | 6                        | 67       |
| Female                                          | 1                        | 9        | 3                        | 33       |
| <b>Race</b>                                     |                          |          |                          |          |
| White                                           | 6                        | 55       | 5                        | 56       |
| Black                                           | 0                        | 0        | 3                        | 33       |
| More than one race                              | 3                        | 27       | 1                        | 11       |
| Declined to respond                             | 2                        | 18       | 0                        | 0        |
| <b>Education</b>                                |                          |          |                          |          |
| High School / GED                               | 5                        | 46       | 1                        | 11       |
| Some college                                    | 2                        | 18       | 6                        | 67       |
| Associates degree                               | 0                        | 0        | 1                        | 11       |
| Bachelor's degree                               | 3                        | 27       | 1                        | 11       |
| Some graduate school                            | 1                        | 9        | 0                        | 0        |
| <b>Diagnosis</b>                                |                          |          |                          |          |
| Schizophrenia                                   | 7                        | 64       | 5                        | 56       |
| Schizoaffective Disorder                        | 4                        | 36       | 4                        | 44       |
| <b>Lifetime Hospitalizations</b>                |                          |          |                          |          |
| 1-5                                             | 6                        | 55       | 4                        | 44       |
| 6-10                                            | 4                        | 36       | 3                        | 33       |
| 11-15                                           | 0                        | 0        | 1                        | 11       |
| 16+                                             | 1                        | 9        | 1                        | 11       |
